# Supplementary material for: Lysozyme Influence on Monolayers of Individual and Mixed Lipids
Source: MDPI journal article supplement (doi:10.3390/colloids6010015), 2022-02-21
Supplement: s1 [file s1]

Archive with 1 entries (1 files):
- colloids-1503154-supplementary.pdf
